# Supplementary material for: Predictive model for long COVID in children 3 months after a SARS-CoV-2 PCR test
Source: BMC Med. 2022 Nov 30;20:465. doi: 10.1186/s12916-022-02664-y (PMC9708506; doi:10.1186/s12916-022-02664-y)
Supplement: Supplementary file 2 — Additional file 2. Risk Calculator for experiencing long COVID 3 months after a PCR test. [file 12916_2022_2664_MOESM2_ESM.xlsx]

## Sheet: Shrunken Model
	Risk Calculator for experiencing long COVID 3 months after a PCR test
											Covid Result			Shrunken Model
									Main effect	Interaction	Positive	Negative		Postive_Shrunk	Negative Shrunk
			Choose characteristic from drop down menu			Covid Test			1.03388	0	1.03388	0		0.998468	0
	Covid status	PCR test result	Positive	0.998468
						Sex	Male	1	0	0	0	0		0	0
	Demographics	Sex	Female	0.350801			Female	2	0.363241	0	0.363241	0.363241		0.350801	0.350801
		Age (11-17)	17	0.153802
		Ethnicity	White	0		Ethnicity	White	6	0	0	0	0		0	0
							Asian	1	0.0816104	-0.162815	-0.0812049	0.0816104		-0.0784238	0.0788154
	Health before/at the time of testing	Overall physical health	Okay	0.434428			Black	2	0.250608	-0.48247	-0.231862	0.250608		-0.223921	0.242025
		Overall mental health	Okay	-0.0172024			Mixed	3	0.453003	-0.288921	0.164082	0.453003		0.158463	0.437489
		Lonliness	Some of the time	0.477203			Other	4	0.130342	-0.897088	-0.766746	0.130342		-0.740487	0.125878
		Number of physical symptoms at time of testing (0-21)	0	1.93748			Prefer not to say	5	-0.580409	1.27249	0.692078	-0.580409		0.668376	-0.560531
		Looking after myself	No problem	0
		Having pain	No problem	0		Physical Health	Very good	4	0	0	0	0		0	0
		Doing usual activities	No problem	0			Good	3	0.319628	0	0.319628	0.319628		0.308682	0.308682
		Feeling worried/sad	A bit	0.612218			Okay	2	0.449834	0	0.449834	0.449834		0.434428	0.434428
	Estimated Risk		0.342128				Very poor/Poor	1	0.489924	0	0.489924	0.489924		0.473145	0.473145
	NOTE: This calculator uses the prediction equation given in Box 1 for estimating the risk of experiencing long COVID 3 months after a PCR-test in CYP aged 11 to 17 years. See Table 4 in main text for illustrative examples derived using this calculator.
						Mental health	Very good	4	0	0	0	0		0	0
							Good	3	0.259491	-0.126972	0.132519	0.259491		0.127981	0.250604
							Okay	2	0.390833	-0.408645	-0.0178124	0.390833		-0.0172024	0.377448
							Very poor/Poor	1	0.451889	0.183872	0.635761	0.451889		0.613988	0.436413
						Loneliness	Never	5	0	0	0	0		0	0
							Hardly Ever	4	0.464312	-0.299115	0.165197	0.464312		0.15954	0.448411
							Occasionally	3	0.835992	-0.409952	0.42604	0.835992		0.411449	0.807361
							Some of the time	2	0.869563	-0.375437	0.494126	0.869563		0.477203	0.839782
							Often/Always	1	0.989392	-0.653666	0.335726	0.989392		0.324228	0.955507
						Looking after myself	No problem	1	0	0	0	0		0	0
							Some/ a lot of problems	2	0.996478	0	0.996478	0.996478		0.962351	0.962351
						Doing usual activitites	No problem	1	0	0	0	0		0	0
							Some/ a lot of problems	2	0.789595	-0.901037	-0.111441	0.789595		-0.107625	0.762554
						Having pain	No problem	1	0	0	0	0		0	0
							Some/ a lot of problems	2	1.73252	0	1.73252	1.73252		1.67319	1.67319
						Feeling worried/sad	No problem	1	0	0	0	0		0	0
							A bit	2	0.633928	0	0.633928	0.633928		0.612218	0.612218
							Very worried/sad	3	1.27242	0	1.27242	1.27242		1.22884	1.22884
						Age (11-17)	Age		0.0239662	-0.0190511	0.159257	-0.245334		0.153802	-0.236932
							Age sq		-0.0352481	0.0513049
														0	0
						Number of physical symptoms at time of testing (0-21)	symp_1		0.0177319		2.00618	2.00618		1.93748	1.93748
							symp_2		2.32994

## Sheet: Sheet3
SEX	Ethnicity	Test	Age	Number of symptoms
Male	White	Positive	11	0
Female	Asian	Negative	12	1
	Black		13	2
	Mixed		14	3
	Other		15	4
	Prefer not to say		16	5
			17	6
				7
				8
				9
				10
				11
				12
				13
				14
				15
				16
				17
				18
				19
				20
				21
